# Supplementary material
Source: Springer Nature journal article supplement (https://www.springermedizin.de/resource/supplementary/13075_2011_3148_MOESM1_ESM.pdf/9693848)

RA (n=17)

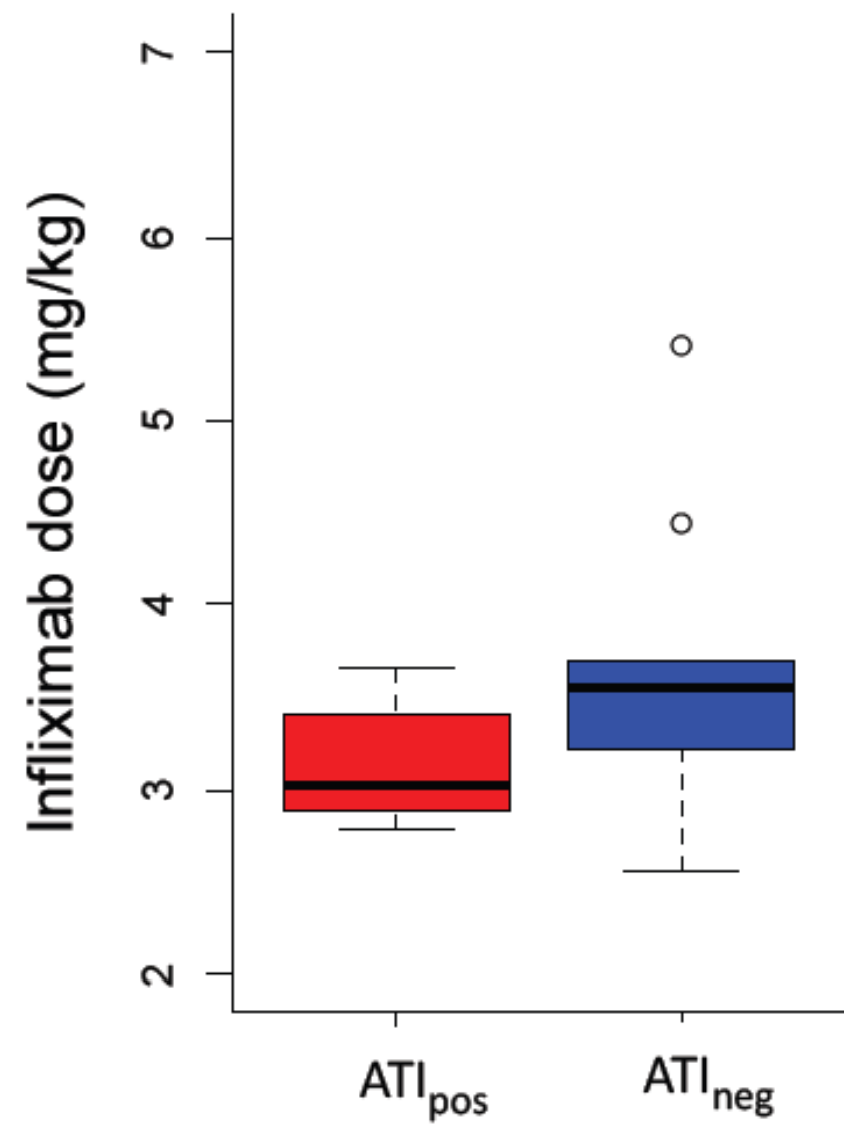

SpA (n=91)

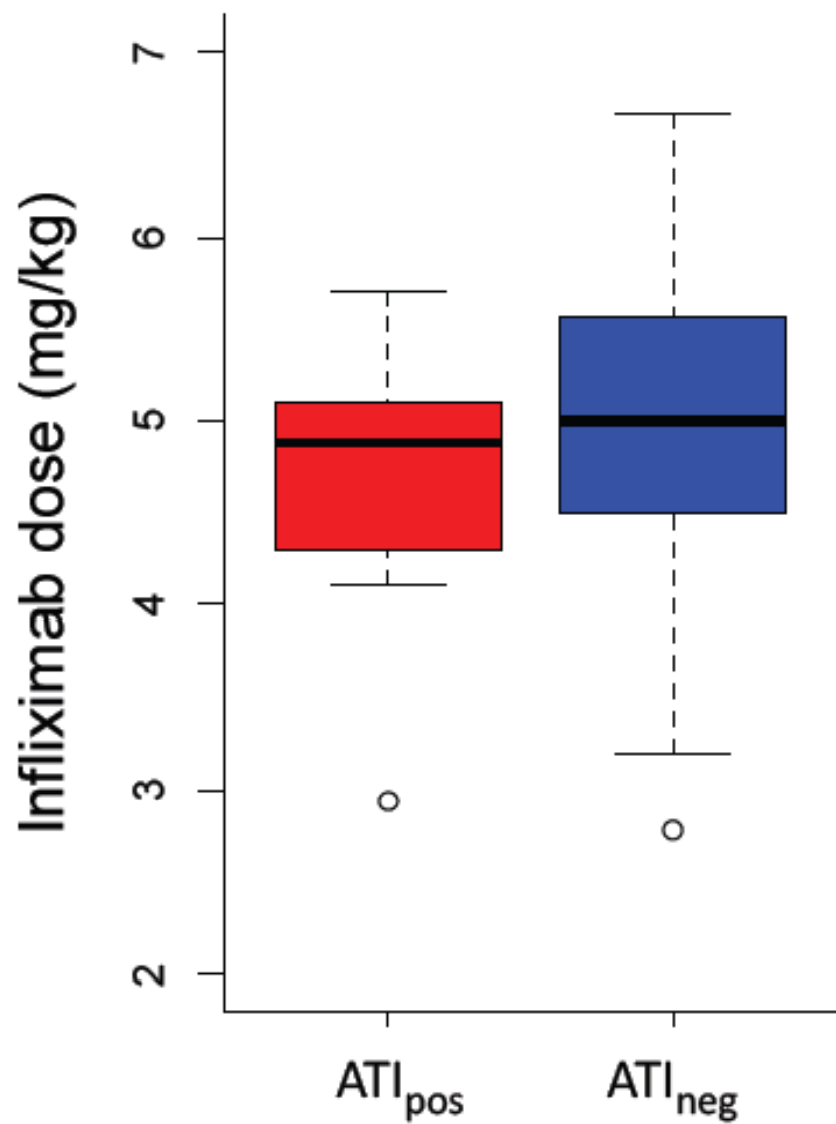

Supplement: MOESM1 [file 9693848]
